# Supplementary material for: Schistosoma mansoni Egg–Secreted Antigens Activate Hepatocellular Carcinoma–Associated Transcription Factors c‐Jun and STAT3 in Hamster and Human Hepatocytes
Source: PubMed Central journal article supplement — Hepatology. 2019 Feb 12;72(2):626–41. doi: 10.1002/hep.30192 (PMC7496692; doi:10.1002/hep.30192), 2019-02-12
Supplement: HEP-72-626-s001.pdf [file HEP-72-626-s001.pdf]

# Suppl. Figure 1

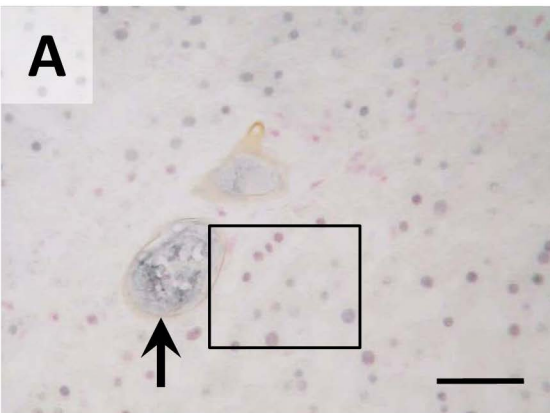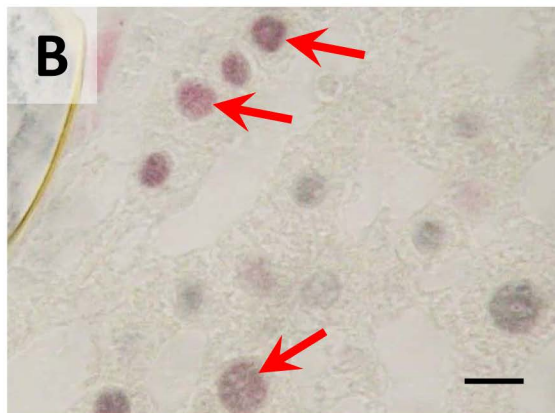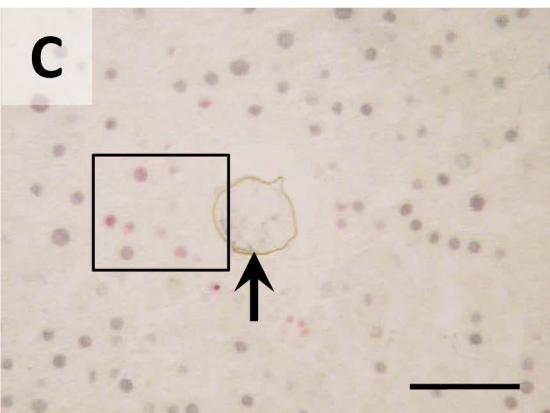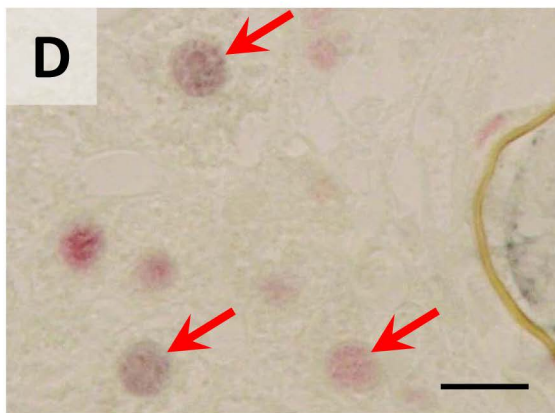

**Suppl. Fig. 1: Liver-trapped eggs of *S. mansoni* before granuloma formation in hamster liver. (A-D)** Immunohistochemical staining of c-Jun (red) and HNF4α (grey) in hepatocyte nuclei around *S. mansoni* eggs without granuloma (arrows). *S. mansoni* egg (arrow). Magnifications are 400x (A and C) and 1000x (B and D). Space bars are 50 μm (A and C) and 10 μm (B and D).

# Suppl. Figure 2

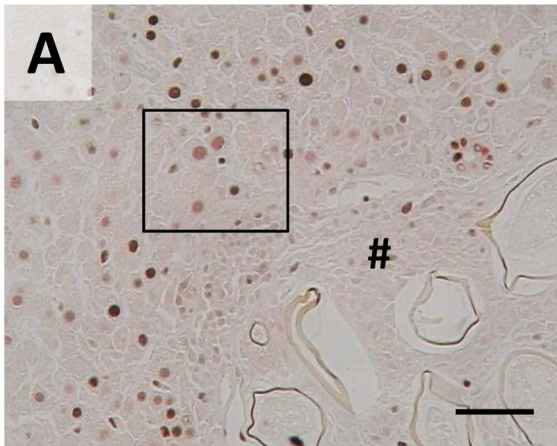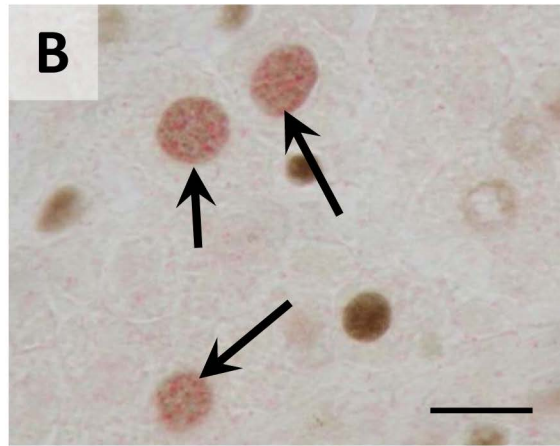

**Suppl. Fig. 2: Co-immunostaining of PCNA and p27 in hepatocytes around granuloma (A and B)** Immunohistochemical staining of PCNA (grey) and p27 (red) points out simultaneous DNA-replication with cells cycle inhibition in the same hepatocytes (arrows) around the granuloma with multiple eggs (hash). Magnification 200x (A) and 1000x (B). Bars 50  $\mu\text{m}$  (A), 10  $\mu\text{m}$  (B).

# Suppl. Figure 3

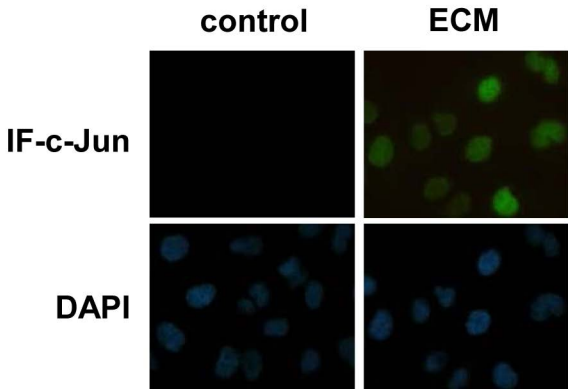

**Suppl. Fig. 3: Immunofluorescence analysis demonstrated the accumulation of c-Jun in the nuclei of SEA-stimulated Huh7 cells. Lower panels DAPI, 1000x.**

# Suppl. Figure 4

## A

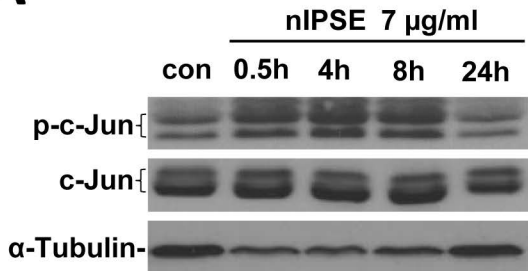

## B

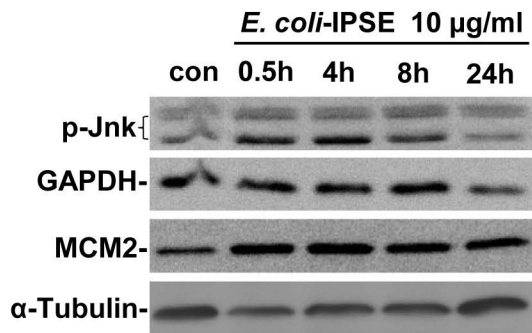

**Suppl. Fig. 4: Representative Western blots demonstrating JNK and c-Jun activation as well as enhanced expression of MCM2 by *S. mansoni* derived IPSE in hiPS-Hep. (A) Temporal stimulation pattern of c-Jun with natural IPSE affinity purified from *S. mansoni* eggs. (B) Temporal stimulation pattern of Jnk and MCM2 with recombinant IPSE produced in *E. coli*.**

# Suppl. Figure 5

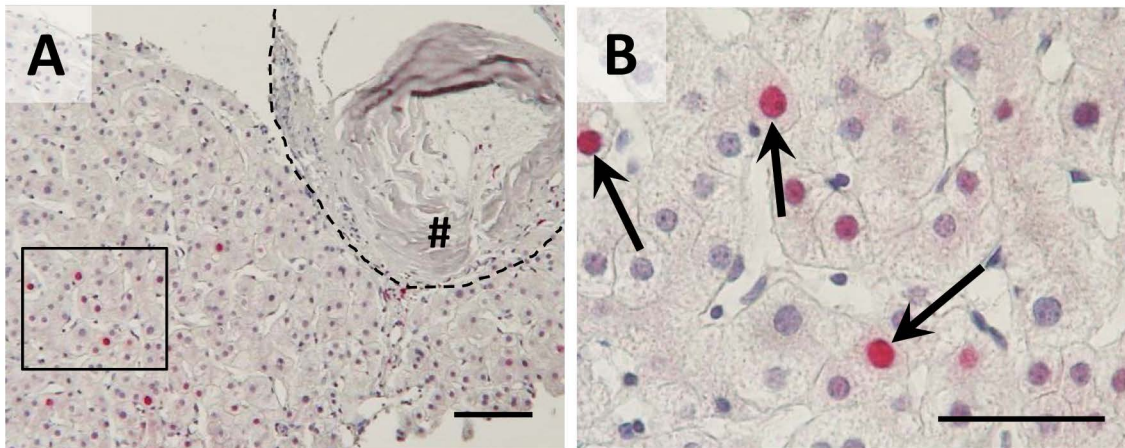

**Suppl. Fig. 5: Immunostaining of Ki67 in hepatocytes around granuloma in human schistosomiasis (A and B)** Immunohistochemical staining of Ki67 (red) in combination with haematoxylin nuclear staining points out proliferation of hepatocytes around the granuloma (hash). Magnification 100x (A) and 400x (B). Bars 100  $\mu$ m (A), 50  $\mu$ m (B). # granuloma, dashed line granuloma border.

# Suppl. Figure 6

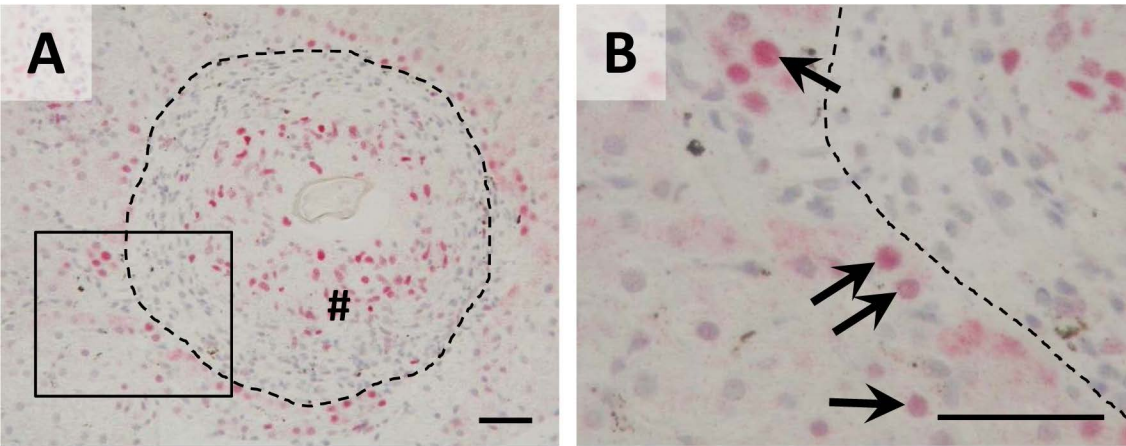

**Suppl. Fig. 6: Immunostaining of c-Jun in hepatocytes around granuloma in human schistosomiasis (A and B)** Immunohistochemical staining of c-Jun (red) in combination with haematoxylin nuclear staining (blue) demonstrates nuclear translocation of c-Jun (arrows) in hepatocytes around the granuloma (hash). Magnification 200x **(A)** and 400x **(B)**. Bars 50  $\mu\text{m}$ . # granuloma, dashed line granuloma border.
